# Supplementary material
Source: PubMed Central journal article supplement (PMC1289409)

Supplementary Figure 1

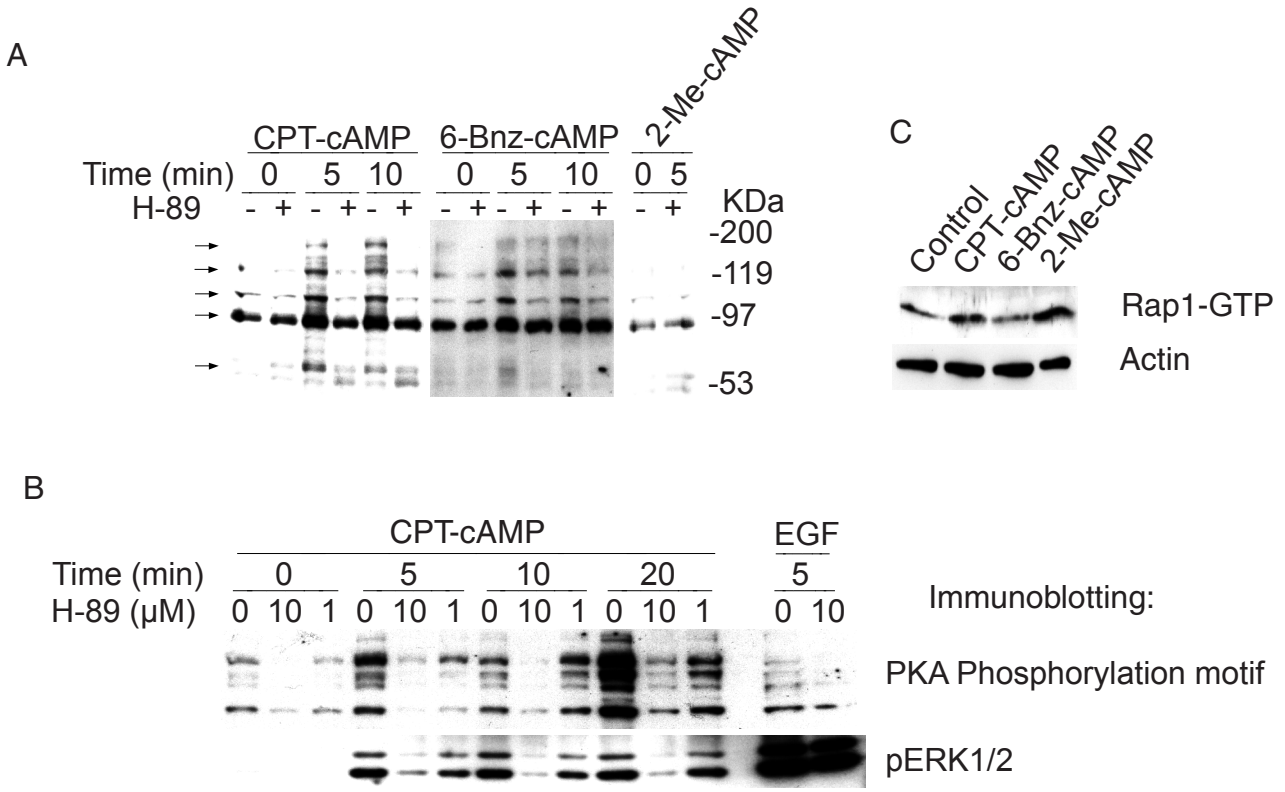

Supplement: mbc_E05-05-0432_1.pdf [file mbc_E05-05-0432_1.pdf]

Supplementary Figure 2

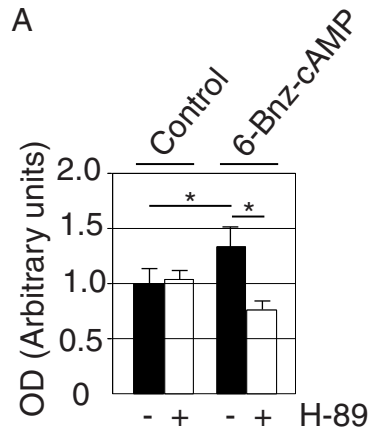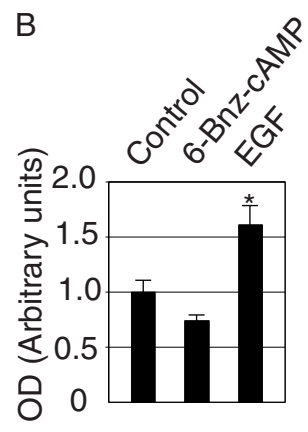

Supplement: mbc_E05-05-0432_2.pdf [file mbc_E05-05-0432_2.pdf]
